# Supplementary material for: Electroswitchable fluorescent thin film controlled by polyoxometalate
Source: Royal Society of Chemistry journal article supplement (doi:10.1039/c0jm03140b), 2010-11-08
Supplement: c0jm03140b.pdf [file c0jm03140b.pdf]

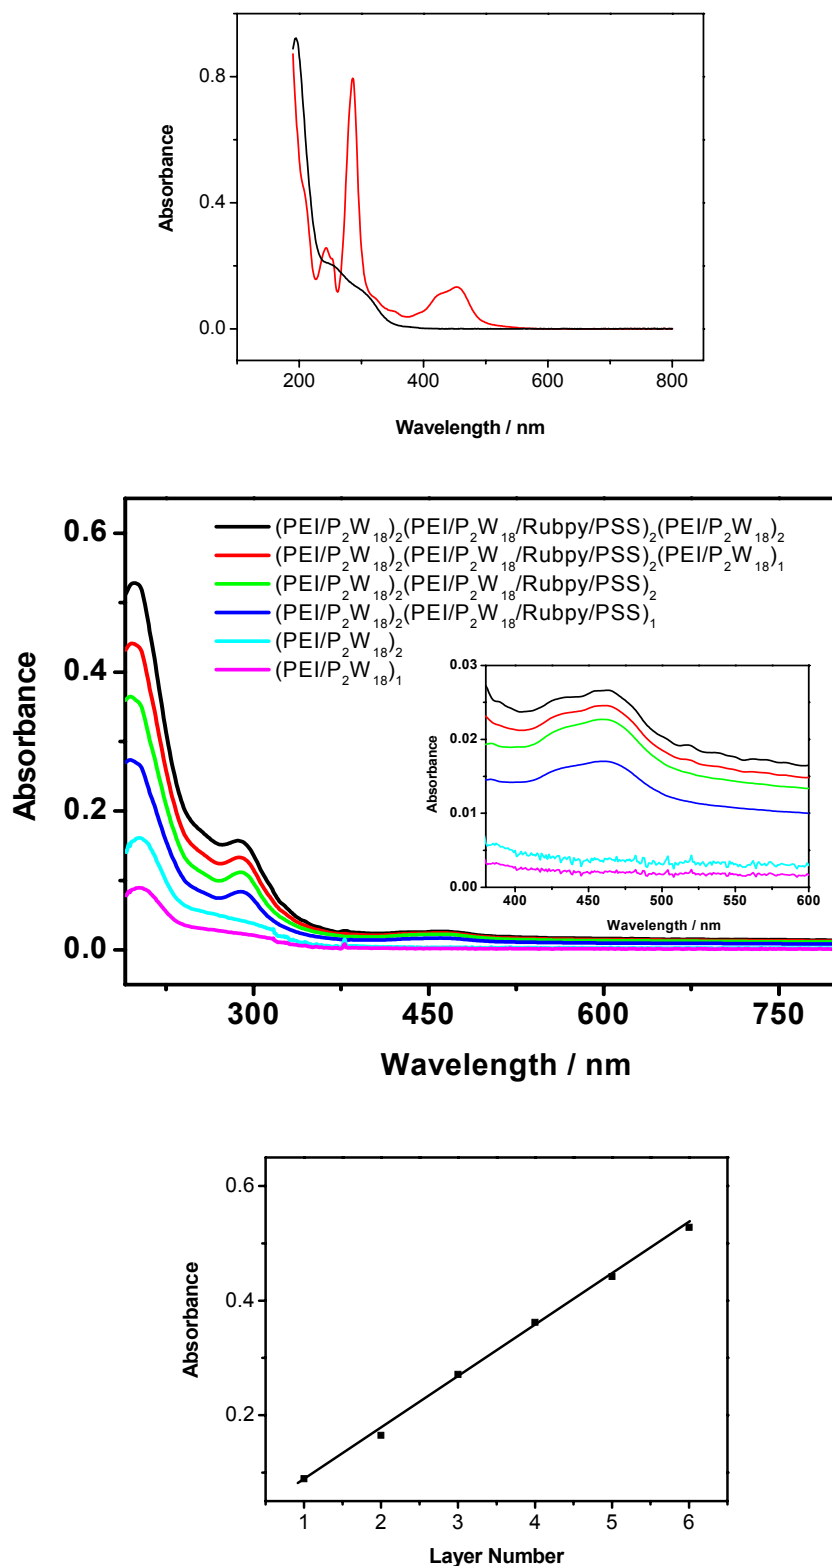

**Fig. S1.** UV-vis spectra of  $P_2W_{18}$  ( $1.2 \times 10^{-5}$  M, black curve) and Rubpy ( $3.47 \times 10^{-5}$  M, red curve) in the solutions (top),  $\{(PEI/P_2W_{18})_2(PEI/P_2W_{18}/Rubpy/PSS)_2(PEI/P_2W_{18})_2\}$  thin-film on quartz as a function of the number of layers (middle) and the relationship of the absorbance at 200 nm as a function of the number of layers (bottom), confirming linear and uniform thin-film growth.

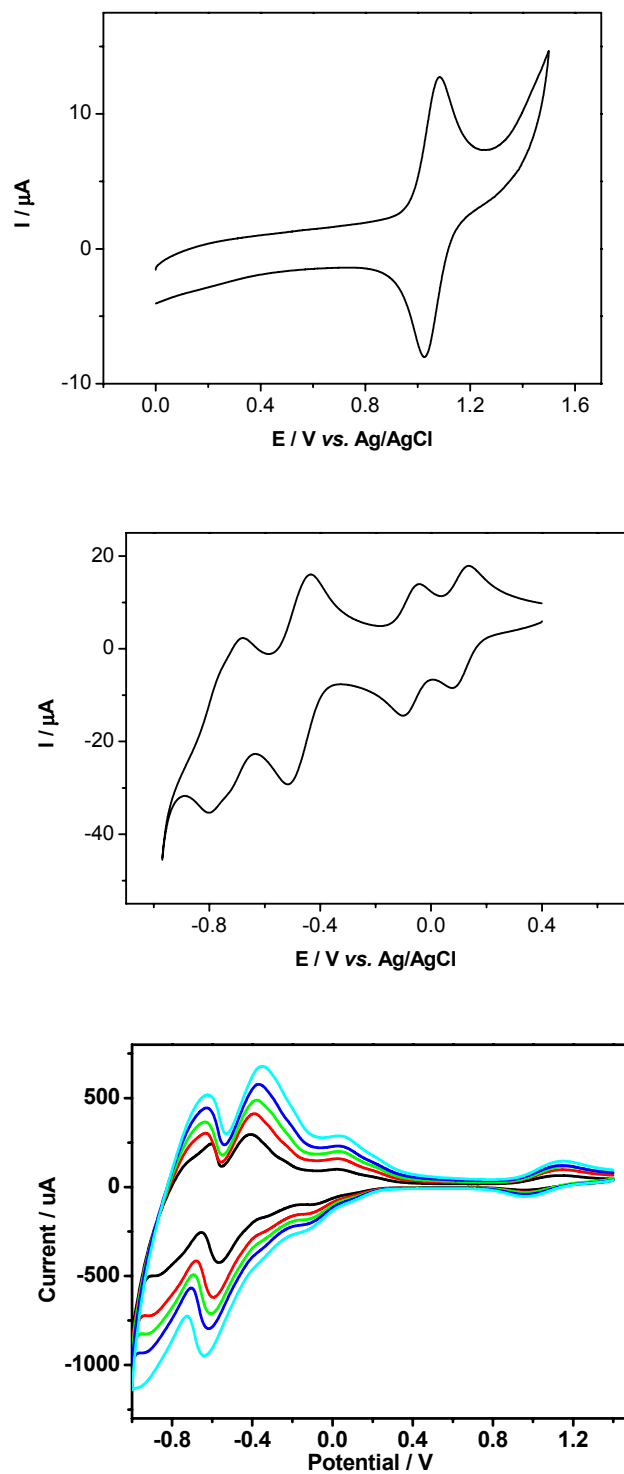

**Fig. S2.** CVs of 1mM Rubpy (top), 1mM  $\text{P}_2\text{W}_{18}$  (middle) and  $\{(\text{PEI}/\text{P}_2\text{W}_{18})_8(\text{PEI}/\text{P}_2\text{W}_{18}/\text{Rubpy}/\text{PSS})_5(\text{PEI}/\text{P}_2\text{W}_{18})_7\}$  thin-film at different scan rates of 50, 80, 100, 120 and 150  $\text{mV}\cdot\text{s}^{-1}$  (bottom) in 0.5 M  $\text{H}_2\text{SO}_4 + \text{Na}_2\text{SO}_4$  at pH 3.

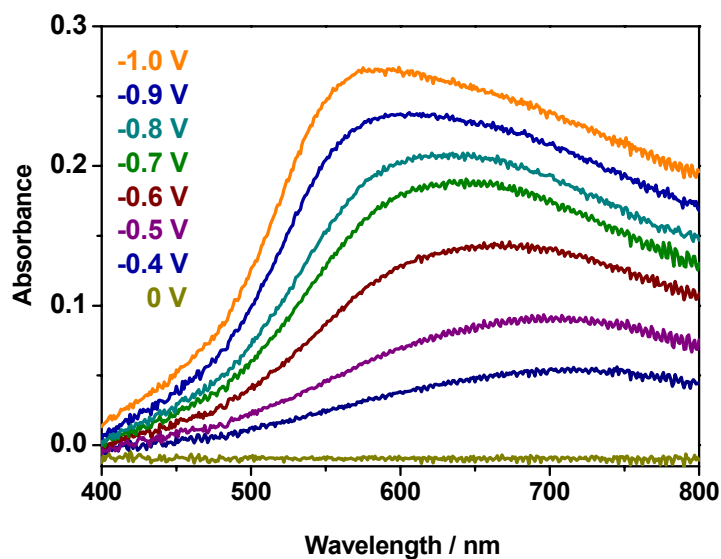

**Fig. S3.** UV-vis absorption spectra of a  $\{(PEI/P_2W_{18})_8(PEI/P_2W_{18}/Rubpy/PSS)_5(PEI/P_2W_{18})_7\}$  thin-film on an ITO-coated glass slide in 0.5 M  $Na_2SO_4 + H_2SO_4$  (pH 3) under open circuit (0V) and electrochemical reduction at the different applied potentials from -0.4 to -1.0 V for 30s.

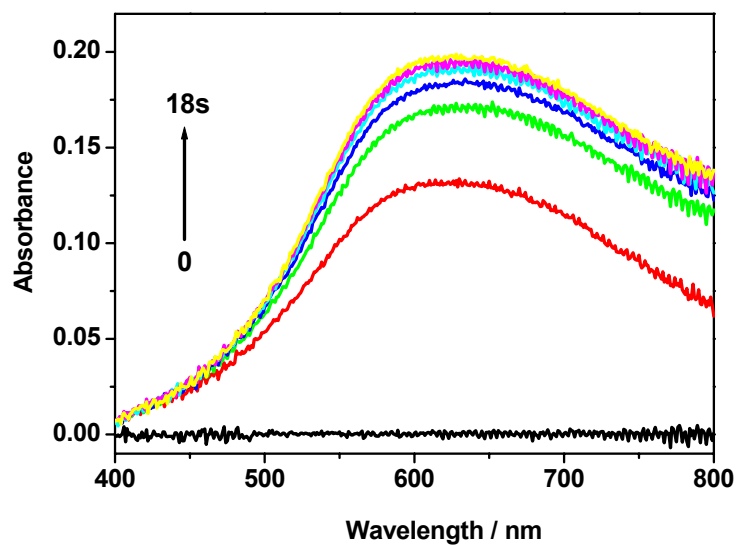

**Fig. S4.** UV-vis absorption spectra of the  $\{(PEI/P_2W_{18})_8(PEI/P_2W_{18}/Rubpy/PSS)_5(PEI/P_2W_{18})_7\}$  thin-film on an ITO-coated glass slide in 0.5 M  $Na_2SO_4 + H_2SO_4$  (pH 3) as a function of electrochemical reduction time. Black curve: open circuit; colored curves: the applied potential of -0.8 V.

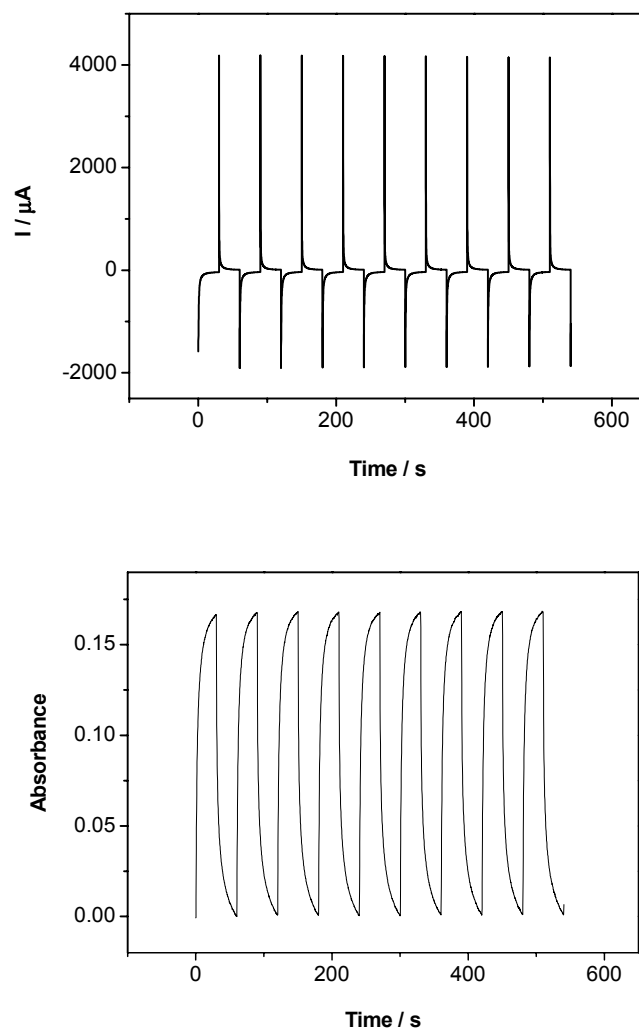

**Fig. S5.** Potential currents (top) and absorbances (bottom) at 627 nm of a  $\{(PEI/P_2W_{18})_8(PEI/P_2W_{18}/Rubpy/PSS)_5(PEI/P_2W_{18})_7\}$  thin-film on an ITO-coated glass slide during subsequent double-potential steps from -0.8 to 0.8 V in 0.5 M  $Na_2SO_4 + H_2SO_4$  solution (pH 3).
